# Supplementary material
Source: ML conference proceedings conference paper supplement (https://openaccess.thecvf.com/content/CVPR2021/html/Tulyakov_Time_Lens_Event-Based_CVPR_2021_paper.html)
Supplement: Supplementary file 1 [file Tulyakov_Time_Lens_Event-Based_CVPR_2021_supplemental.zip]

Archive with 3 entries (2 files):
- supmat/
- supmat/supmat.pdf
- supmat/supmat.mp4
